# Supplementary material for: NIR luminescence of a series of benzoyltrifluoroacetone erbium complexes
Source: Royal Society of Chemistry journal article supplement (doi:10.1039/c5ra12954k), 2015-01-01
Supplement: c5ra12954k1.pdf [file c5ra12954k1.pdf]

## Supporting Information

### NIR luminescence of a series of benzoyltrifluoroacetone erbium complexes

Qingyan Sun, Pengfei Yan, Wanying Niu, Wenyi Chu\*, Xu Yao, Guanghui An, Guangming Li\*

*Key Laboratory of Functional Inorganic Material Chemistry (MOE), School of Chemistry and Materials Science, Heilongjiang University, No. 74, Xuefu Road, Nangang District, Harbin, Heilongjiang 150080, P. R. China, E-mail: [gml\\_2000@163.com](mailto:gml_2000@163.com). Fax: (+86)451-86608458; Tel: (+86) 451-86608458*

#### Index

|                  |                                                                                                          |
|------------------|----------------------------------------------------------------------------------------------------------|
| <b>Fig. S1-3</b> | TG-DSC curves of complex <b>1-5</b>                                                                      |
| <b>Fig. S4-6</b> | The powder X-ray diffraction spectra of the simulated patterns and experimental for complexes <b>1-5</b> |
| <b>Fig. S7</b>   | IR spectra of bta and complexes <b>1-5</b>                                                               |
| <b>Fig. S8</b>   | Excitation spectra of complexes <b>1-5</b>                                                               |
| <b>Table S1</b>  | Selected bond lengths (Å) and angles (°) for complexes <b>1-3</b>                                        |
| <b>Table S2</b>  | Selected bond lengths (Å) and angles (°) for complexes <b>4 and 5</b> .                                  |

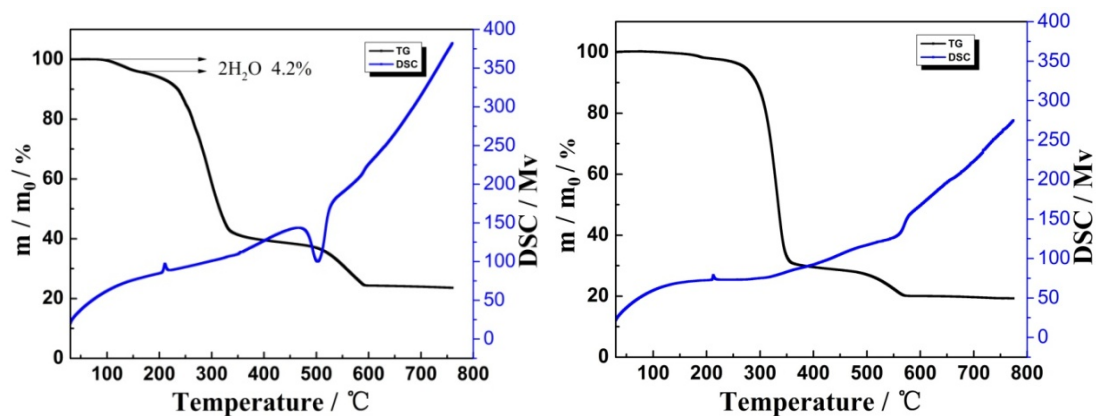

Fig. S1 TG–DSC curves of complexes 1 (left) and 2 (right).

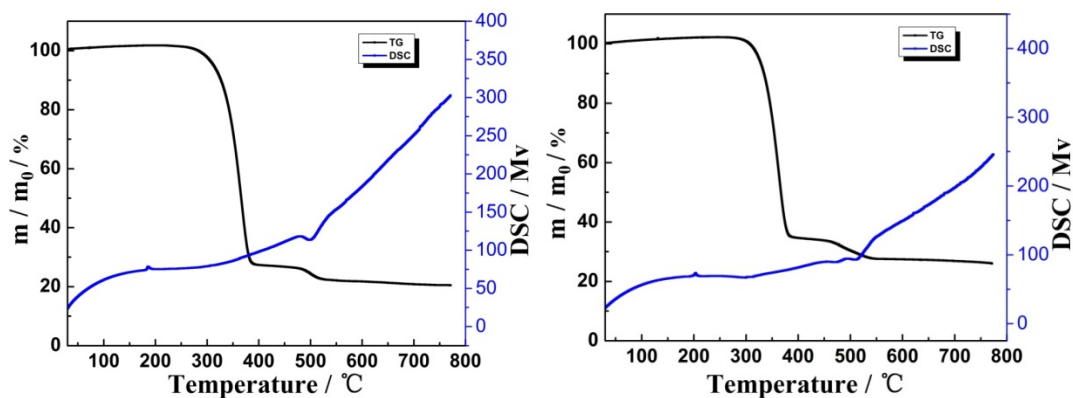

Fig. S2 TG–DSC curves of complexes 3 (left) and 4 (right)

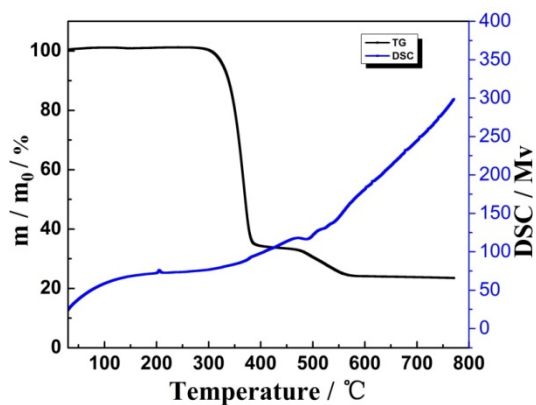

Fig. S3 TG–DSC curves of complex 5

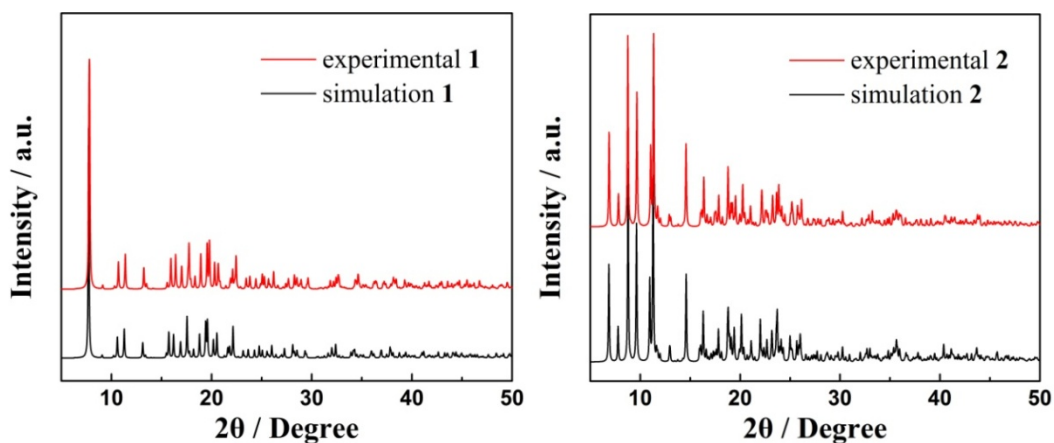

Fig. S4 The powder X-ray diffraction spectra of the simulated patterns and experimental for complexes 1 (left) and 2 (right).

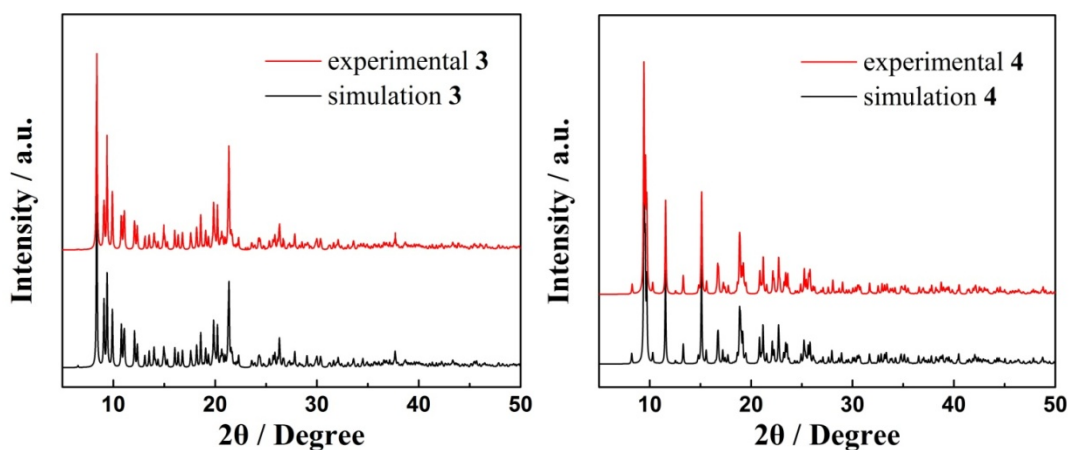

Fig. S5 The powder X-ray diffraction spectra of the simulated patterns and experimental for complexes 3 (left) and 4 (right).

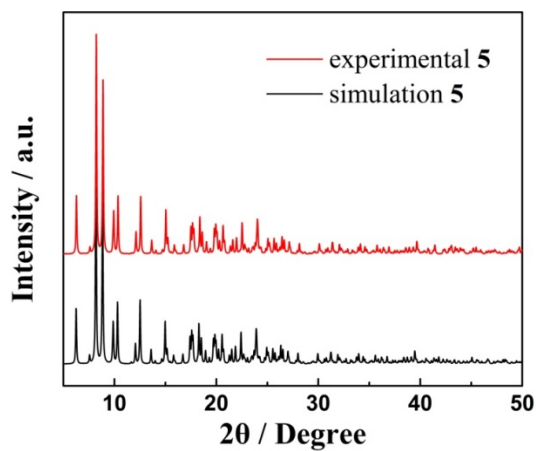

Fig. S6 The powder X-ray diffraction spectra of the simulated patterns and experimental for complex 5.

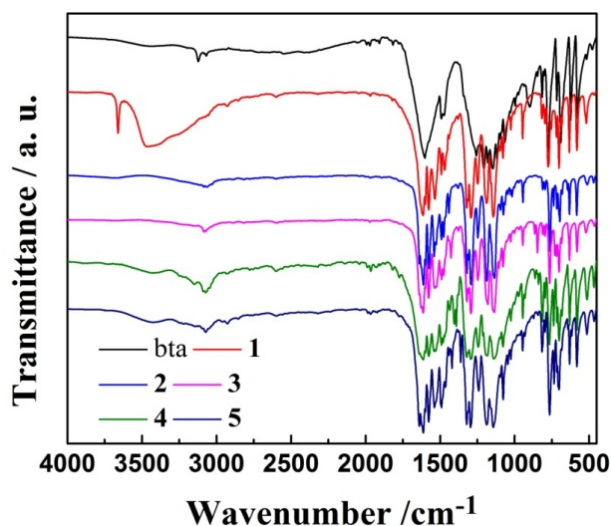

Fig. S7 IR spectra of bta and complexes 1–5.

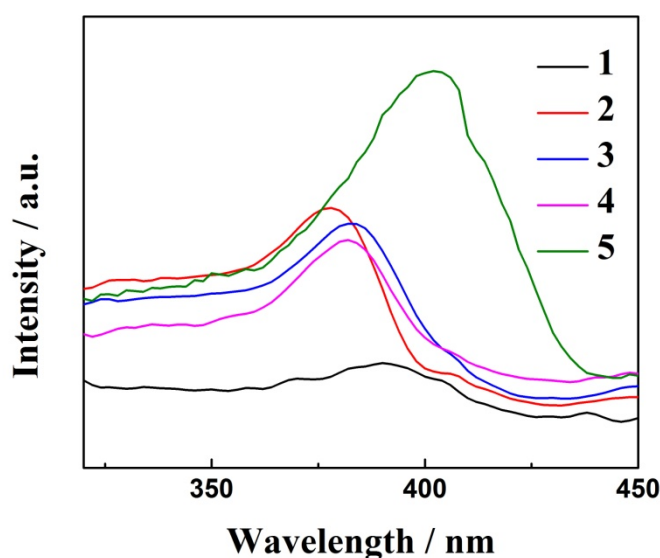

Fig. S8 Excitation spectra of complexes 1–5

Table S1 Selected bond lengths (Å) and angles (°) for complexes 1–3.

| 1               |            | 2               |            | 3                |            |
|-----------------|------------|-----------------|------------|------------------|------------|
| O(1)–Er(1)      | 2.371(3)   | O(1)–Er(1)      | 2.304(4)   | O(7)–Er(2)       | 2.335(4)   |
| O(2)–Er(1)      | 2.391(3)   | O(2)–Er(1)      | 2.328(3)   | O(8)–Er(2)       | 2.294(4)   |
| O(3)–Er(1)      | 2.338(3)   | O(3)–Er(1)      | 2.301(3)   | O(9)–Er(2)       | 2.263(4)   |
| O(4)–Er(1)      | 2.293(4)   | O(4)–Er(1)      | 2.278(4)   | O(10)–Er(2)      | 2.313(4)   |
| O(5)–Er(1)      | 2.349(3)   | O(5)–Er(1)      | 2.282(4)   | O(11)–Er(2)      | 2.293(4)   |
| O(6)–Er(1)      | 2.284(3)   | O(6)–Er(1)      | 2.312(4)   | O(12)–Er(2)      | 2.315(3)   |
| O(7)–Er(1)      | 2.247(3)   | N(1)–Er(1)      | 2.515(4)   | N(3)–Er(2)       | 2.525(4)   |
| O(8)–Er(1)      | 2.401(3)   | N(2)–Er(1)      | 2.513(4)   | N(4)–Er(2)       | 2.556(4)   |
| O(6)–Er(1)–O(4) | 136.56(12) | O(3)–Er(1)–O(2) | 78.90(13)  | O(10)–Er(2)–O(7) | 116.45(14) |
| O(7)–Er(1)–O(3) | 75.56(13)  | O(5)–Er(1)–O(2) | 148.33(13) | O(8)–Er(2)–O(7)  | 72.00(13)  |
| O(6)–Er(1)–O(5) | 72.73(12)  | O(4)–Er(1)–N(1) | 142.56(13) | O(9)–Er(2)–N(3)  | 138.28(13) |
| O(6)–Er(1)–O(1) | 73.09(12)  | O(6)–Er(1)–N(2) | 71.05(14)  | O(11)–Er(2)–N(4) | 70.13(13)  |

**Table S2** Selected bond lengths (Å) and angles (°) for complexes **4** and **5**.

| <b>4</b>        |          | <b>5</b>        |            |
|-----------------|----------|-----------------|------------|
| O(1)–Er(1)      | 2.295(5) | O(1)–Er(1)      | 2.300(5)   |
| O(2)–Er(1)      | 2.320(6) | O(2)–Er(1)      | 2.304(5)   |
| O(3)–Er(1)      | 2.282(5) | O(3)–Er(1)      | 2.295(5)   |
| O(4)–Er(1)      | 2.272(6) | O(4)–Er(1)      | 2.266(5)   |
| O(5)–Er(1)      | 2.296(5) | O(5)–Er(1)      | 2.303(5)   |
| O(6)–Er(1)      | 2.301(6) | O(6)–Er(1)      | 2.304(5)   |
| N(1)–Er(1)      | 2.526(7) | N(1)–Er(1)      | 2.507(5)   |
| N(2)–Er(1)      | 2.531(8) | N(2)–Er(1)      | 2.508(5)   |
| O(5)–Er(1)–O(1) | 116.0(2) | O(4)–Er(1)–O(3) | 73.43(18)  |
| O(5)–Er(1)–O(4) | 86.3(2)  | O(3)–Er(1)–O(1) | 121.88(17) |
| O(5)–Er(1)–N(1) | 149.1(2) | O(4)–Er(1)–N(1) | 145.90(18) |
| O(3)–Er(1)–N(2) | 71.7(2)  | O(4)–Er(1)–N(2) | 149.52(18) |
